# Supplementary material
Source: PubMed Central journal article supplement (PMC9275126)

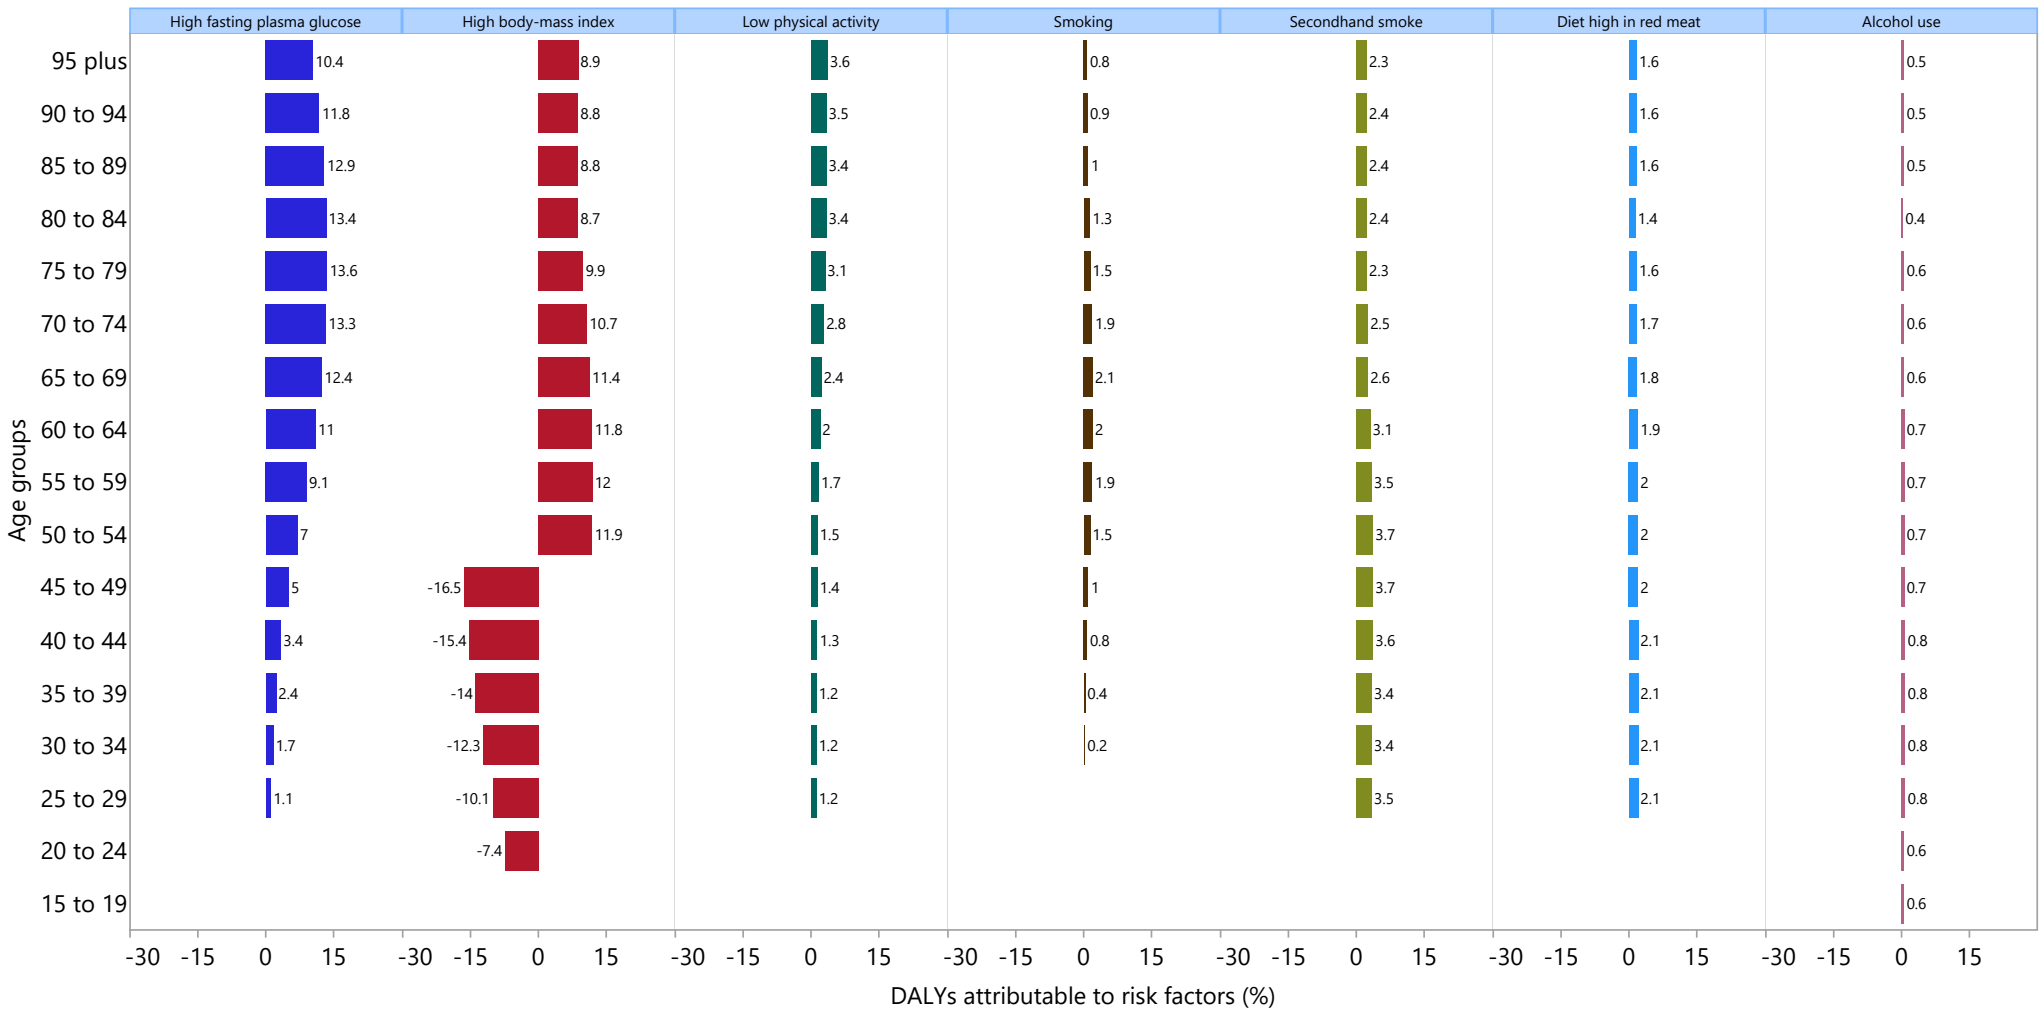

Supplement: 13690_2022_918_MOESM4_ESM.pdf [file 13690_2022_918_MOESM4_ESM.pdf]
